# Supplementary material for: Profile and healthcare utilisation patterns of adolescent frequent attenders in Singapore primary care: a retrospective study
Source: PubMed Central journal article supplement — BMJ Open. 2024 Aug 31;14(8):e080429. doi: 10.1136/bmjopen-2023-080429 (PMC11367386; doi:10.1136/bmjopen-2023-080429), 2024-08-31
Supplement: bmjopen-14-8-s001.pdf [file bmjopen-14-8-s001.pdf]

1 **APPENDIX A**

| <b>Diagnosis Categories by Systems</b> | <b>Diagnosis Description</b>                                                                                                                                                                                                                                                                                                                                                                                                                                           | <b>Diagnosis Category</b>                                                                                                                                                                                              |
|----------------------------------------|------------------------------------------------------------------------------------------------------------------------------------------------------------------------------------------------------------------------------------------------------------------------------------------------------------------------------------------------------------------------------------------------------------------------------------------------------------------------|------------------------------------------------------------------------------------------------------------------------------------------------------------------------------------------------------------------------|
| Respiratory                            | Acute bronchitis<br>Pneumonia<br>Upper respiratory tract infection<br>Allergic rhinitis<br>Asthma (bronchial)<br>Other Respiratory Conditions                                                                                                                                                                                                                                                                                                                          | Acute<br>Acute<br>Acute<br>Chronic<br>Chronic<br>Chronic                                                                                                                                                               |
| Musculoskeletal & Trauma               | Abrasion<br>Achilles Tendinitis<br>Arthralgia & myalgia<br>Arthropathy<br>Backache<br>Bunion/Hallux Valgus<br>Burns<br>Contusion<br>Dislocation<br>Disorder of synovium, tendon & bursa<br>Foreign Body - skin<br>Fractures<br>Head injury<br>Open wound<br>Osteoarthritis<br>Other deformities of ankle and foot<br>Other Injuries<br>Other musculoskeletal conditions<br>Pes planus<br>Plantar Fasciitis<br>Rheumatoid arthritis<br>Spinal disorder<br>Sprain/strain | Acute<br>Acute<br>Acute<br>Chronic<br>Chronic<br>Chronic<br>Acute<br>Acute<br>Acute<br>Chronic<br>Acute<br>Acute<br>Acute<br>Chronic<br>Chronic<br>Acute<br>Chronic<br>Chronic<br>Acute<br>Chronic<br>Chronic<br>Acute |
| Skin                                   | Acne<br>Alopecia<br>Corn/callus<br>Eczema<br>Fungal infection<br>Nail disease<br>Other Skin Conditions<br>Pruritus<br>Psoriasis<br>Skin infection<br>Urticaria                                                                                                                                                                                                                                                                                                         | Chronic<br>Chronic<br>Chronic<br>Chronic<br>Acute<br>Chronic<br>Chronic<br>Chronic<br>Chronic<br>Acute<br>Chronic                                                                                                      |
| Miscellaneous                          | Adverse effect, medication, chemical<br>Allergy, unspecified                                                                                                                                                                                                                                                                                                                                                                                                           | Acute<br>Acute                                                                                                                                                                                                         |

|                     |                                                                                                                                                                                                                                                                                                                                                                                                                                                                                                                                                                                       |                                                                                                                                                                                                                                                                                                           |
|---------------------|---------------------------------------------------------------------------------------------------------------------------------------------------------------------------------------------------------------------------------------------------------------------------------------------------------------------------------------------------------------------------------------------------------------------------------------------------------------------------------------------------------------------------------------------------------------------------------------|-----------------------------------------------------------------------------------------------------------------------------------------------------------------------------------------------------------------------------------------------------------------------------------------------------------|
|                     | <ul style="list-style-type: none"> <li>Basic health screen</li> <li>Benign neoplasms</li> <li>Complication of medical care</li> <li>Diabetic retinopathy photography</li> <li>Follow-up exam</li> <li>Follow-up post-surgery</li> <li>Health education</li> <li>Medical exam/investigations</li> <li>Travel clinic</li> </ul>                                                                                                                                                                                                                                                         | <ul style="list-style-type: none"> <li>Preventive</li> <li>Acute</li> <li>Acute</li> <li>Preventive</li> <li>Acute</li> <li>Preventive</li> <li>Preventive</li> <li>Preventive</li> <li>Preventive</li> </ul>                                                                                             |
| Neurology           | <ul style="list-style-type: none"> <li>Epilepsy</li> <li>Giddiness, not specified</li> <li>Headache, not specified</li> <li>Migraine</li> <li>Other CNS Conditions</li> </ul>                                                                                                                                                                                                                                                                                                                                                                                                         | <ul style="list-style-type: none"> <li>Chronic</li> <li>Acute</li> <li>Acute</li> <li>Chronic</li> <li>Chronic</li> </ul>                                                                                                                                                                                 |
| Infectious Diseases | <ul style="list-style-type: none"> <li>Chickenpox</li> <li>COVID-19: Confirmed Case</li> <li>COVID-19: History of Exposure</li> <li>COVID-19: Suspect Case</li> <li>Dengue fever</li> <li>Enteritis (Gastroenteritis)</li> <li>Fever without localizing symptoms</li> <li>Genital Herpes (First Episode)</li> <li>Hand, foot &amp; mouth disease</li> <li>Herpes zoster</li> <li>Influenza-like illness</li> <li>Other notifiable infections</li> <li>Other venereal disease</li> <li>Other non-notifiable infections</li> <li>Scabies</li> <li>Tuberculosis</li> <li>Wart</li> </ul> | <ul style="list-style-type: none"> <li>Acute</li> <li>Chronic</li> <li>Acute</li> </ul> |
| Gastrointestinal    | <ul style="list-style-type: none"> <li>Appendicitis</li> <li>Chronic liver disease</li> <li>Constipation</li> <li>Dyspepsia</li> <li>Gastritis</li> <li>Gastro-esophageal reflux disease</li> <li>Hernia</li> <li>Irritable bowel syndrome</li> <li>Oral soft tissue disease</li> <li>Other gastrointestinal Conditions</li> <li>Peptic Ulcer Disease</li> <li>Piles</li> <li>Teeth &amp; supporting structure disease</li> </ul>                                                                                                                                                     | <ul style="list-style-type: none"> <li>Acute</li> <li>Chronic</li> <li>Acute</li> <li>Acute</li> <li>Chronic</li> <li>Chronic</li> <li>Acute</li> <li>Chronic</li> <li>Acute</li> <li>Chronic</li> <li>Chronic</li> <li>Acute</li> <li>Acute</li> </ul>                                                   |
| Other Services      | <ul style="list-style-type: none"> <li>Family planning</li> <li>Hepatitis B carrier follow-up</li> </ul>                                                                                                                                                                                                                                                                                                                                                                                                                                                                              | <ul style="list-style-type: none"> <li>Preventive</li> <li>Chronic</li> </ul>                                                                                                                                                                                                                             |

|                     |                                                                                                                                                                                                                                                                                                   |                                                                                                 |
|---------------------|---------------------------------------------------------------------------------------------------------------------------------------------------------------------------------------------------------------------------------------------------------------------------------------------------|-------------------------------------------------------------------------------------------------|
|                     | Other conditions of perinatal origin<br>Other screening/Growth monitoring<br>Questionnaires<br>Preventive measures/ immunization child<br>Well child: Dr: 3mth,18mth,4yr<br>developmental assessment 9mth, 3yr<br>Well child: Dr: Newborn to 4yr<br>developmental assessment<br>Well women clinic | Chronic<br><br>Preventive<br>Preventive<br><br>Preventive<br><br>Preventive<br>Preventive       |
| Eye                 | Cataracts<br>Conjunctivitis<br>Eyelid disorder<br>Foreign Body eye<br>Other Eye Conditions<br>Refractive vision                                                                                                                                                                                   | Chronic<br>Acute<br>Acute<br>Acute<br>Acute<br>Chronic                                          |
| Gynecology & Breast | Breast lump<br>Dysmenorrhea<br>Menopausal disorders<br>Menorrhagia<br>Other Breast Conditions<br>Other Gynecological Conditions                                                                                                                                                                   | Acute<br>Chronic<br>Chronic<br>Chronic<br>Chronic<br>Acute                                      |
| Psychiatry          | Anxiety<br>Bipolar Disorders<br>Depression (Major)<br>Depression (others)<br>Insomnia<br>Neurosis<br>Other psychiatric conditions<br>Psychosis<br>Schizophrenia                                                                                                                                   | Chronic<br>Chronic<br>Chronic<br>Chronic<br>Chronic<br>Chronic<br>Chronic<br>Chronic<br>Chronic |
| Ear                 | Ear wax<br>Foreign Body ear<br>Hearing loss<br>Other Ear Conditions<br>Otitis externa<br>Otitis media                                                                                                                                                                                             | Acute<br>Acute<br>Chronic<br>Acute<br>Acute<br>Acute                                            |
| Cardiovascular      | Arrhythmias<br>Chest Pain<br>Hypertension (Diet Only)<br>Hypertension on medication<br>Other cardiovascular conditions<br>Varicose veins, legs                                                                                                                                                    | Chronic<br>Acute<br>Chronic<br>Chronic<br>Chronic<br>Chronic                                    |
| Renal/Urinary       | Acute kidney injury<br>Calculus, urinary tract<br>Erectile dysfunction<br>Incontinence/enuresis                                                                                                                                                                                                   | Acute<br>Chronic<br>Acute<br>Chronic                                                            |



8 **APPENDIX B**

| <b>Type/Class of Medication</b> | <b>Formulations available at SHPs</b>                                                          |
|---------------------------------|------------------------------------------------------------------------------------------------|
| Benzodiazepines                 | Clonazepam Tablet<br>Diazepam Tablet<br>Lorazepam Tablet<br>Alprazolam Tablet                  |
| Codeine/opioid                  | Panadeine Tablet (Paracetamol, Codeine)<br>Codeine Phosphate Tablet<br>Tramadol Capsule/Tablet |
| Dextromethorphan                | Dextromethorphan Tablet<br>Dextromethorphan Linctus                                            |
| Gabapentin                      | Gabapentin Capsule                                                                             |
| Procodin                        | Procodin Syrup                                                                                 |
| Promethazine HCl                | Promethazine Syrup<br>Promethazine Injection                                                   |
