# Supplementary material for: Profile and healthcare utilisation patterns of adolescent frequent attenders in Singapore primary care: a retrospective study
Source: PubMed Central journal article supplement — BMJ Open. 2024 Aug 31;14(8):e080429. doi: 10.1136/bmjopen-2023-080429 (PMC11367386; doi:10.1136/bmjopen-2023-080429), 2024-08-31
Supplement: bmjopen-14-8-s002.pdf [file bmjopen-14-8-s002.pdf]

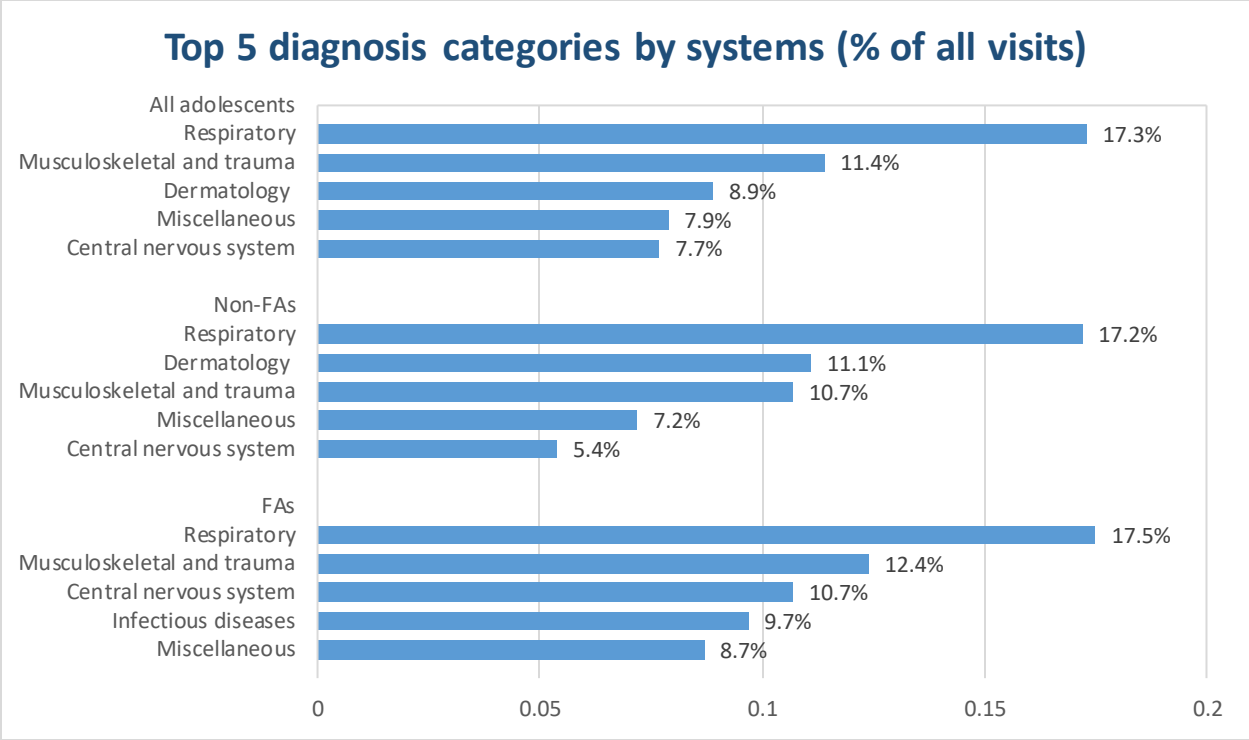

**A: Top 5 diagnosis categories by systems**

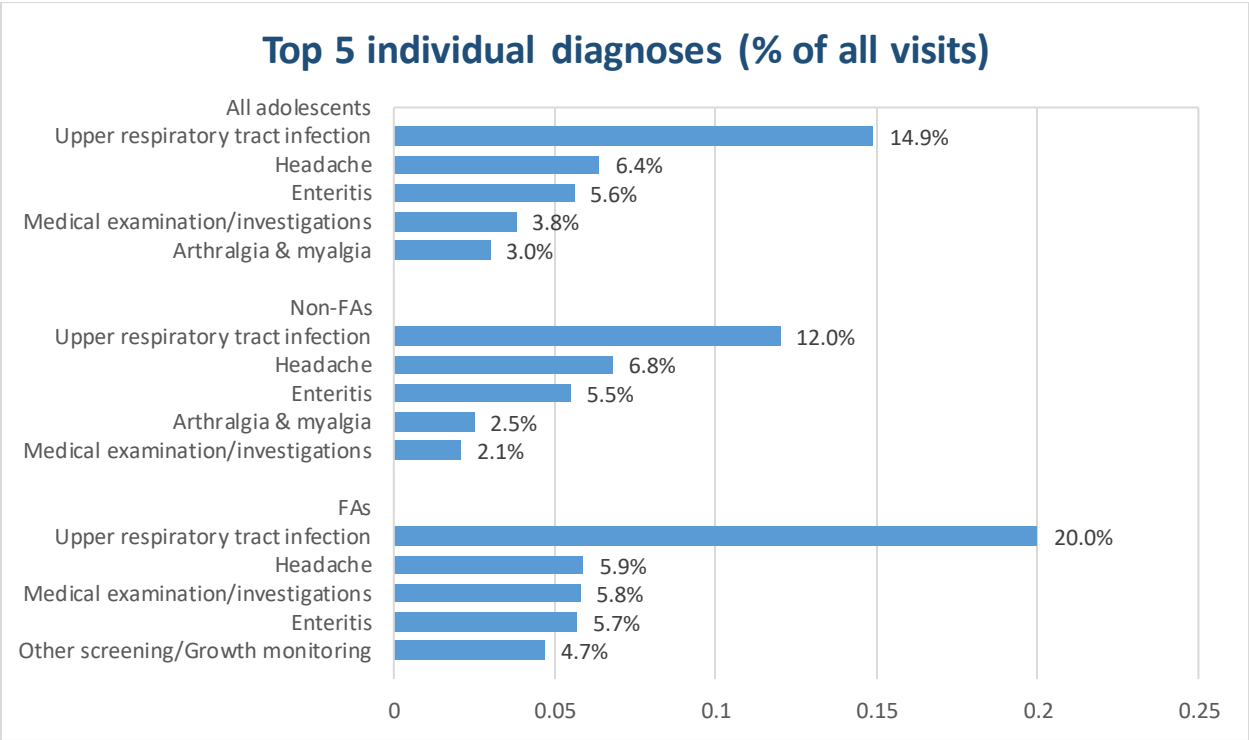

**B: Top 5 individual diagnoses**

### Top 5 specialist referrals (% of all visits)

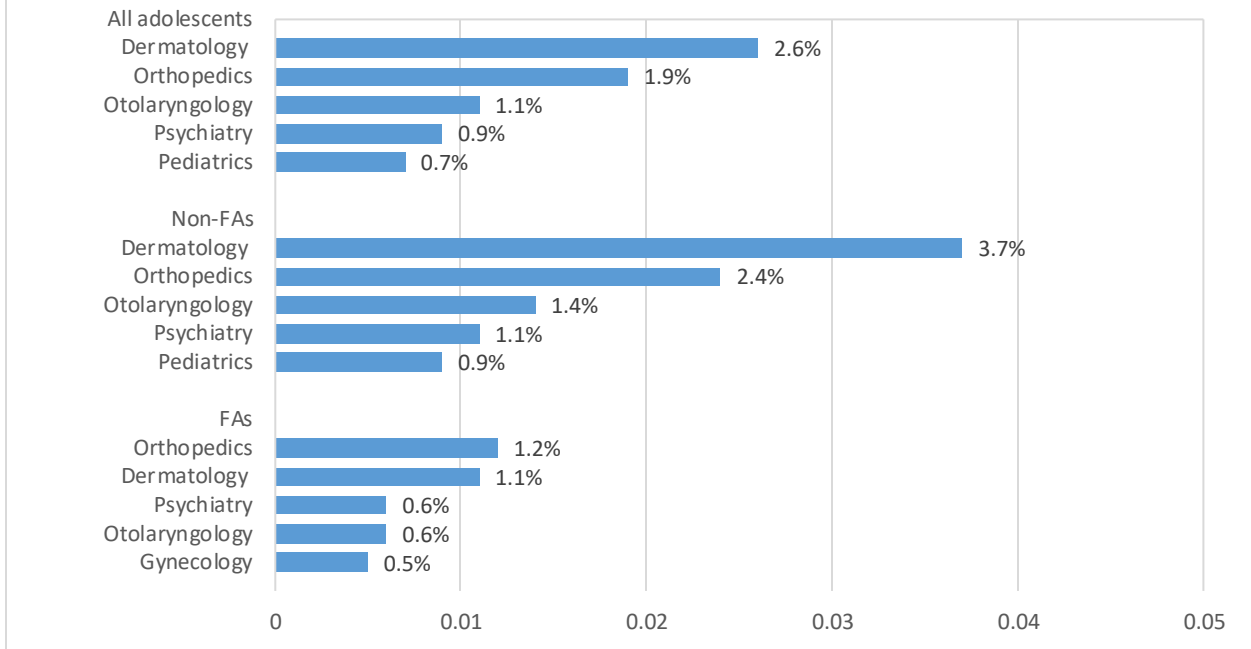

**C: Top 5 specialist referrals**
